# Supplementary material
Source: PubMed Central journal article supplement (PMC5083188)
Supplement: NIHMS813972-supplement-Legacy_Supplemental_File.pdf [file NIHMS813972-supplement-Legacy_Supplemental_File.pdf]

**Hazard ratio\* (95% CI) of CVD mortality by tertile of FABP4, RBP4, and HMW adiponectin in men with T2D**

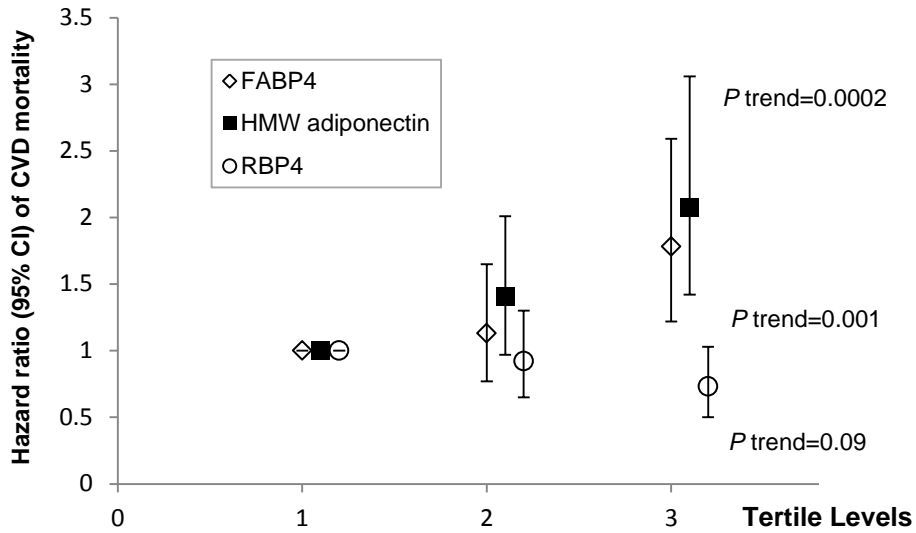

\* Multivariate adjustment including demographics, lifestyle factors, and other covariates.

**FABP4:** Fatty Acid-Binding Protein 4; **RBP4:** Retinol-Binding Protein 4; **HMW:** High-Molecular Weight
