# Supplementary material
Source: PubMed Central journal article supplement (PMC5083188)
Supplement: NIHMS813972-supplement-Supplementary_Materials_clean.pdf [file NIHMS813972-supplement-Supplementary_Materials_clean.pdf]

## SUPPLEMENTAL MATERIAL

**Supplementary Table I.** Spearman partial correlation coefficients among adipokines and baseline characteristics

|                    | FABP4    | RBP4     | HMW adiponectin |
|--------------------|----------|----------|-----------------|
| Age at blood drawn | 0.15***  | 0.09**   | 0.11**          |
| BMI (baseline)     | 0.40***  | 0.01†    | -0.19*          |
| BMI at age 21      | 0.19***  | -0.04†   | -0.07*          |
| TG                 | 0.19***  | 0.27***  | -0.32***        |
| HDL                | -0.23*** | -0.07*   | 0.37***         |
| LDL                | -0.07*   | -0.01†   | 0.11***         |
| CRP                | 0.33***  | -0.07*   | -0.18***        |
| HbA1C              | 0.05†    | -0.13*** | -0.13***        |
| TNFR2              | 0.32***  | 0.14***  | 0.01†           |
| eGFR               | -0.25*** | -0.31*** | 0.06*           |
| RBP4               | 0.26***  | 1.00     | 0.02†           |
| HMW adiponectin    | -0.09**  | 0.02†    | 1.00            |

Spearman partial correlation coefficients were calculated after multivariate adjustment of age at blood draw (yr), date of blood draw (yr), body mass index at age 21 (kg/m<sup>2</sup>), physical activity, smoking status (never smoked, <10 pack-years, 10-24 pack-years, 25-44 pack-years, 45-64 pack-years, 65+ pack-years, missing), alcohol consumption (non-drinker, <5.0 g/day, 5.0-9.9 g/day, 10.0-14.9 g/day, 15.0-29.9 g/day, ≥30.0 g/day, missing), diabetes duration (yr), family history of myocardial infarction, aHEI score, use of aspirin or cholesterol-lowering medication (yes, no), baseline history of hypertension, high cholesterol, angina, CABG, myocardial infarction, and stroke (yes, no). \**P*<0.05; \*\**P*<0.01; \*\*\**P*<0.001.

† No significant association was observed.

**Supplementary Table II.** Hazard ratio (95% CI) of all-cause mortality associated with FABP4, RBP4, and HMW adiponectin levels

|                        | Tertile level |                   |                   | <i>P</i> for trend |
|------------------------|---------------|-------------------|-------------------|--------------------|
|                        | 1             | 2                 | 3                 |                    |
| <b>FABP4</b>           |               |                   |                   |                    |
| Case/person-years      | 160/4681      | 188/4451          | 232/3971          |                    |
| Model 1*               | 1.0           | 1.19 (0.96, 1.47) | 1.77 (1.45, 2.17) | <0.0001            |
| Model 2†               | 1.0           | 1.17 (0.93, 1.46) | 1.61 (1.30, 2.01) | <0.0001            |
| Model 3‡               | 1.0           | 1.14 (0.91, 1.44) | 1.59 (1.27, 2.00) | <0.0001            |
| <b>RBP4</b>            |               |                   |                   |                    |
| Case/person-years      | 188/4349      | 190/4441          | 202/4312          |                    |
| Model 1*               | 1.0           | 0.98 (0.80, 1.20) | 0.94 (0.77, 1.14) | 0.52               |
| Model 2†               | 1.0           | 1.05 (0.85, 1.29) | 0.95 (0.77, 1.18) | 0.61               |
| Model 3‡               | 1.0           | 1.00 (0.81, 1.24) | 0.87 (0.69, 1.10) | 0.21               |
| <b>HMW adiponectin</b> |               |                   |                   |                    |
| Case/person-years      | 165/4567      | 201/4456          | 214/4080          |                    |
| Model 1*               | 1.0           | 1.16 (0.94, 1.42) | 1.30 (1.06, 1.60) | 0.01               |
| Model 2†               | 1.0           | 1.19 (0.96, 1.49) | 1.42 (1.14, 1.77) | 0.002              |
| Model 3‡               | 1.0           | 1.26 (1.01, 1.58) | 1.57 (1.24, 2.00) | 0.0003             |

\*Model 1 was adjusted for age at blood draw.

†Based on Model 1, Model 2 was further adjusted for date of blood draw (yr), body mass index at age 21 (kg/m<sup>2</sup>), physical activity, smoking status (never smoked, <10 pack-years, 10-24 pack-years, 25-44 pack-years, 45-64 pack-years, 65+ pack-years, missing), alcohol consumption (non-drinker, <5.0 g/day, 5.0-9.9 g/day, 10.0-14.9 g/day, 15.0-29.9 g/day, ≥30.0 g/day, missing),

diabetes duration (yr), family history of myocardial infarction, aHEI score, use of aspirin or cholesterol-lowering medication (yes, no), baseline history of hypertension, high cholesterol, angina, CABG, myocardial infarction, and stroke (yes, no).

‡Based on Model 2, Model 3 was further adjusted for triacylglycerol levels (mg/dL), high-density lipoprotein cholesterol (mg/dL), low-density lipoprotein cholesterol (mg/dL), eGFR, and CRP.

**Supplementary Table III.** Hazard ratio (95% CI) of cancer mortality associated with FABP4, RBP4, and HMW adiponectin levels

|                        | Tertile level |                   |                   | <i>P</i> for trend |
|------------------------|---------------|-------------------|-------------------|--------------------|
|                        | 1             | 2                 | 3                 |                    |
| <b>FABP4</b>           |               |                   |                   |                    |
| Case/person-years      | 27/4681       | 37/4451           | 49/3971           |                    |
| Model 1*               | 1.0           | 1.36 (0.83, 2.24) | 2.12 (1.32, 3.40) | 0.001              |
| Model 2†               | 1.0           | 1.27 (0.76, 2.14) | 1.86 (1.12, 3.09) | 0.01               |
| Model 3‡               | 1.0           | 1.38 (0.81, 2.35) | 2.10 (1.24, 3.58) | 0.005              |
| <b>RBP4</b>            |               |                   |                   |                    |
| Case/person-years      | 32/4349       | 41/4441           | 40/4312           |                    |
| Model 1*               | 1.0           | 1.21 (0.76, 1.93) | 1.13 (0.71, 1.81) | 0.65               |
| Model 2†               | 1.0           | 1.25 (0.78, 2.01) | 1.14 (0.70, 1.85) | 0.65               |
| Model 3‡               | 1.0           | 1.35 (0.83, 2.21) | 1.32 (0.78, 2.24) | 0.34               |
| <b>HMW adiponectin</b> |               |                   |                   |                    |
| Case/person-years      | 40/4567       | 40/4456           | 33/4080           |                    |
| Model 1*               | 1.0           | 0.93 (0.60, 1.44) | 0.81 (0.51, 1.28) | 0.36               |
| Model 2†               | 1.0           | 0.86 (0.54, 1.37) | 0.83 (0.51, 1.37) | 0.52               |
| Model 3‡               | 1.0           | 0.82 (0.51, 1.33) | 0.75 (0.44, 1.30) | 0.34               |

\*Model 1 was adjusted for age at blood draw.

†Based on Model 1, Model 2 was further adjusted for date of blood draw (yr), body mass index at age 21 (kg/m<sup>2</sup>), physical activity, smoking status (never smoked, <10 pack-years, 10-24 pack-years, 25-44 pack-years, 45-64 pack-years, 65+ pack-years, missing), alcohol consumption (non-drinker, <5.0 g/day, 5.0-9.9 g/day, 10.0-14.9 g/day, 15.0-29.9 g/day, ≥30.0 g/day, missing), diabetes duration (yr), family history of myocardial infarction, aHEI score, use of aspirin or

cholesterol-lowering medication (yes, no), baseline history of hypertension, high cholesterol, angina, CABG, myocardial infarction, and stroke (yes, no).

‡Based on Model 2, Model 3 was further adjusted for triacylglycerol levels (mg/dL), high-density lipoprotein cholesterol (mg/dL), low-density lipoprotein cholesterol (mg/dL), eGFR, and CRP.

**Supplementary Table IV.** Associations between SNPs, FABP4, and CVD mortality

| SNPs                       | Biomarker (FABP4) |          | CVD mortality |          |
|----------------------------|-------------------|----------|---------------|----------|
|                            | Estimate          | <i>P</i> | Estimate      | <i>P</i> |
| <b>FABP4</b>               |                   |          |               |          |
| LogFABP4 (Observational) * |                   |          | 1.8           | <0.001   |
| rs3824088_G                | 0.02              | 0.30     |               |          |
| LogFABP4 (Causal)          |                   |          | 4.2           | 0.73     |
| rs7835371_A                | -0.002            | 0.89     |               |          |
| LogFABP4 (Causal)          |                   |          | 57.3          | 0.54     |
| rs1054135_T                | 0.007             | 0.65     |               |          |
| LogFABP4 (Causal)          |                   |          | -3.8          | 0.89     |
| rs6992708_C                | -0.008            | 0.41     |               |          |
| LogFABP4 (Causal)          |                   |          | -10.4         | 0.50     |
| rs8192688_A                | -0.02             | 0.07     |               |          |
| LogFABP4 (Causal)          |                   |          | -12.8         | 0.06     |
| rs1843560_C                | -0.007            | 0.51     |               |          |
| LogFABP4 (Causal)          |                   |          | -32.5         | 0.09     |
| rs10808846_T               | -0.01             | 0.21     |               |          |
| LogFABP4 (Causal)          |                   |          | -14.5         | 0.16     |
| <b>FABP4_SNP_Score†</b>    | -0.01             | 0.41     |               |          |
| LogFABP4 (Causal)          |                   |          | -18.8         | 0.23     |

\* Crude estimates without adjustment for any covariates.

† The unweighted score of each individual was calculated by summing the number of risk alleles.
